# Supplementary material for: Characterisation of synovial fluid and infrapatellar fat pad derived mesenchymal stromal cells: The influence of tissue source and inflammatory stimulus
Source: PubMed Central journal article supplement (PMC4829842; doi:10.1038/srep24295), 2016-04-13
Supplement: srep24295-s1.pdf [file srep24295-s1.pdf]

Characterisation of synovial fluid and infrapatellar fat pad derived mesenchymal stromal cells: The influence of tissue source and inflammatory stimulus.

Authors: John Garcia, Karina Wright, Sally Roberts, Jan Herman Kuiper, Chas Mangham, James Richardson, Claire Mennan.

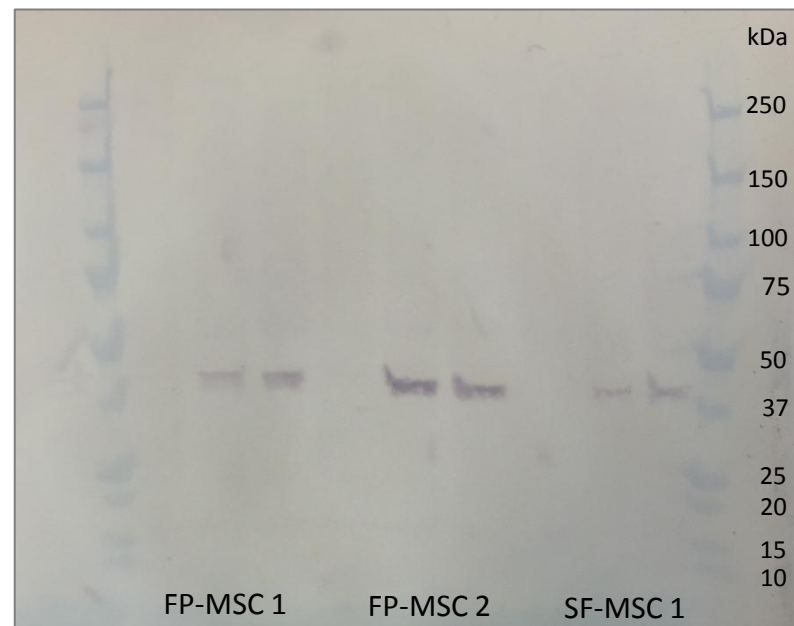

**Supplementary Figure S1.** Full Western blot image indicating the production of IDO (42 kDa) by FP-MSCs (FP-MSC 1) and SF-MSCs (SF-MSC 1) after stimulation with IFN- $\gamma$  (25ng/ml and 500 ng/ml), but not in untreated controls.
